# Supplementary material
Source: PubMed Central journal article supplement (PMC3871770)
Supplement: ASN.2012121197_ASN2012121197SupplementaryData.pdf [file ASN.2012121197_ASN2012121197SupplementaryData.pdf]

**Supplemental Table. Results from all LVMI and LVH models**

| Model and effect    | Lognormal       | Weibull         | Mixed           | GEE             |                   |
|---------------------|-----------------|-----------------|-----------------|-----------------|-------------------|
|                     |                 |                 |                 | Auto regressive | Compound Symmetry |
| <u>LVMI and SBP</u> |                 |                 |                 |                 |                   |
| Visit 4             | -0.45 (0.12)*** | -0.45 (0.12)*** | -0.49 (0.12)*** | -0.48 (0.11)*** | -0.48 (0.11)***   |
| Visit 6             | -0.51 (0.20)*   | -0.51 (0.20)*   | -0.69 (0.20)*** | -0.74 (0.21)*** | -0.69 (0.19)***   |
| SBP × Visit 2       | 0.033 (0.01)*   | 0.033 (0.01)*   | 0.031 (0.01)*   | 0.032 (0.01)*   | 0.031 (0.01)*     |
| SBP × Visit 4       | 0.070 (0.02)*** | 0.070 (0.02)*** | 0.061 (0.02)*** | 0.064 (0.01)*** | 0.063 (0.01)***   |
| SBP × Visit 6       | 0.076 (0.03)**  | 0.076 (0.03)**  | 0.062 (0.03)*   | 0.065 (0.03)*   | 0.063 (0.03)*     |
| <u>LVMI and DBP</u> |                 |                 |                 |                 |                   |
| Visit 4             | -0.45 (0.12)*** | -0.45 (0.12)*** | -0.49 (0.12)*** | -0.48 (0.11)*** | -0.48 (0.11)***   |
| Visit 6             | -0.40 (0.20)*   | -0.40 (0.20)    | -0.64 (0.20)**  | -0.67 (0.21)**  | -0.63 (0.20)**    |
| SBP × Visit 2       | -0.00053 (0.02) | -0.00061 (0.02) | 0.0013 (0.02)   | 0.00097 (0.02)  | 0.0011 (0.02)     |
| SBP × Visit 4       | 0.048 (0.02)*   | 0.048 (0.02)*   | 0.045 (0.02)*   | 0.046 (0.02)**  | 0.045 (0.02)**    |
| SBP × Visit 6       | -0.011 (0.03)   | -0.012 (0.03)   | 0.0091 (0.03)   | 0.0046 (0.03)   | 0.0088 (0.02)     |
| <u>LVH and SBP</u>  |                 |                 |                 |                 |                   |
| Visit 4             | -3.06 (2.21)    | -2.67 (1.72)    | -3.15 (2.09)    | -2.63 (1.30)*   | -2.59 (1.29)*     |
| Visit 6             | -5.29 (3.88)    | -5.21 (3.08)    | -5.33 (3.63)    | -5.21 (3.05)    | -4.80 (2.71)      |
| SBP × Visit 2       | 0.60 (0.24)*    | 0.41 (0.16)*    | 0.63 (0.23)**   | 0.40 (0.14)**   | 0.39 (0.14)**     |
| SBP × Visit 4       | 0.99 (0.28)***  | 0.81 (0.21)***  | 0.99 (0.28)***  | 0.68 (0.16)***  | 0.67 (0.16)***    |
| SBP × Visit 6       | 0.52 (0.49)     | 0.43 (0.35)     | 0.47 (0.45)     | 0.35 (0.23)     | 0.31 (0.20)       |
| <u>LVH and DBP</u>  |                 |                 |                 |                 |                   |
| Visit 4             | -2.23 (2.09)    | -1.89 (1.61)    | -2.30 (1.98)    | -1.84 (1.17)    | -1.82 (1.16)      |
| Visit 6             | -5.01 (3.90)    | -4.92 (3.08)    | -5.02 (3.66)    | -4.77 (3.06)    | -4.55 (2.74)      |
| SBP × Visit 2       | 0.44 (0.28)     | 0.29 (0.20)     | 0.53 (0.27)     | 0.33 (0.18)     | 0.32 (0.18)       |
| SBP × Visit 4       | 0.51 (0.29)     | 0.48 (0.21)*    | 0.52 (0.28)     | 0.37 (0.20)     | 0.35 (0.20)       |
| SBP × Visit 6       | 0.033 (0.53)    | 0.027 (0.38)    | -0.011 (0.46)   | -0.0025 (0.23)  | 0.022 (0.22)      |

\*p<0.05, \*\*p<0.01, \*\*\*p<0.001
